# Supplementary material
Source: publisher figshare collection journal article supplement (https://gsajournals.figshare.com/articles/dataset/_/12609710)
Supplement: Supplementary file 1 [file 1]

**SUPPLEMENTAL MATERIAL** for

**New Aspects of Invasive Growth Regulation Identified  
by Functional Profiling of MAPK Pathway Targets in  
*Saccharomyces cerevisiae***

by Matt D. Vandermeulen and Paul J. Cullen†

Department of Biological Sciences, University at Buffalo, Buffalo, NY 14260-1300

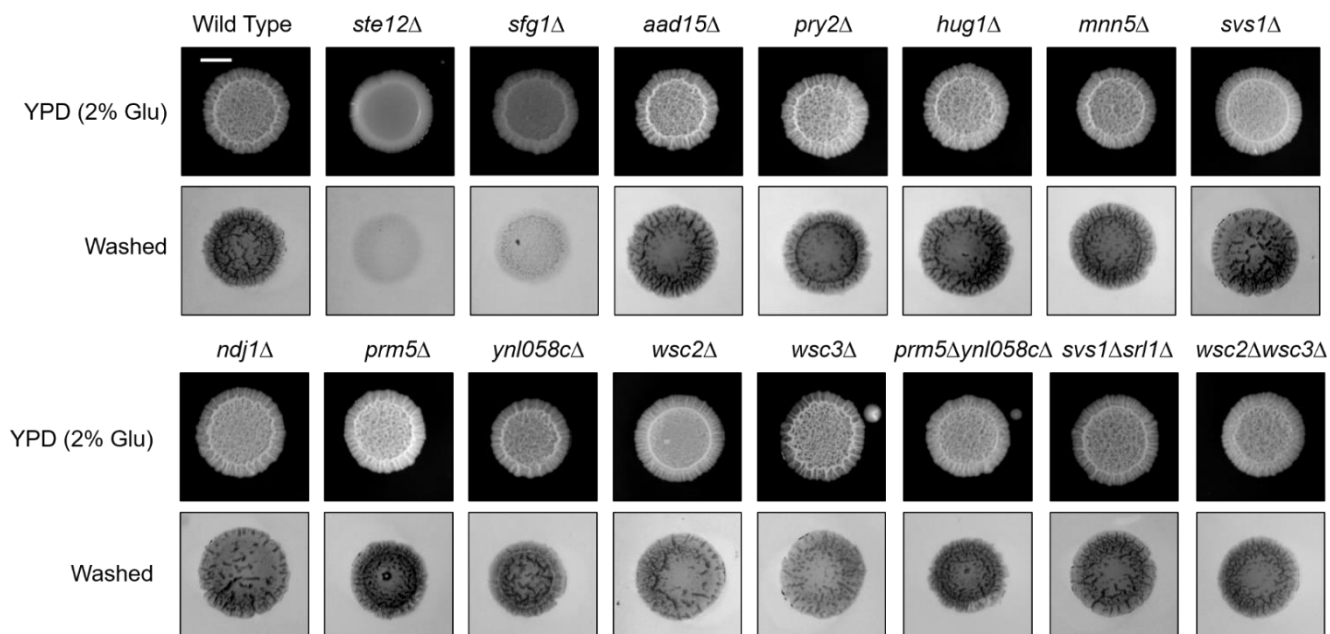

**Figure S1. Survey of fMAPK targets by the plate-washing assay.** Plate-washing assay for wild type (PC538), *ste12Δ* (PC539), *sfg1Δ* (PC7144), *aad15Δ* (PC7238), *pry2Δ* (PC7240), *hug1Δ* (PC7239), *mnn5Δ* (PC7241), *svs1Δ* (PC7167), *ndj1Δ* (PC7168), *svs1Δ srl1Δ* (PC7202), *prm5Δ* (PC7169), *ynl058cΔ* (PC7201), *prm5Δ ynl058cΔ* (PC7203), *wsc2Δ* (PC7170), *wsc3Δ* (PC7200), and *wsc2Δ wsc3Δ* (PC7243) strains on YPD (2% Glu) for 3 d. Top row, colonies, bottom row, inverted image after wash, bar = 0.5 cm. One target explored was one of the top 5 inhibited targets, *HUG1*, not shown in the volcano plot with no phenotype.

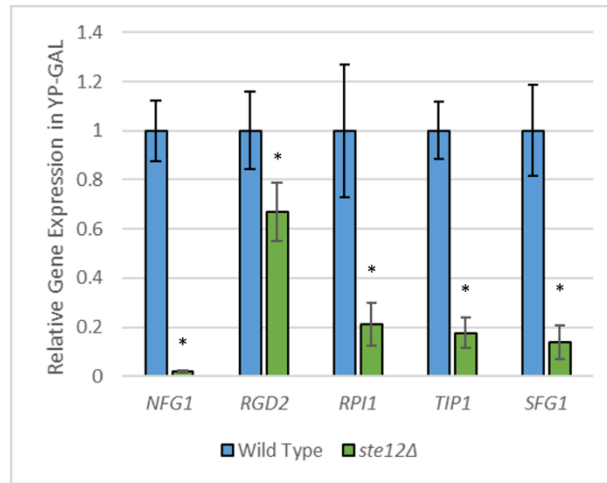

**Figure S2. Targets of the fMAPK pathway verified by RT-qPCR.** Relative gene expression by RT-qPCR of target gene (*NFG1*, *RGD2*, *RPI1*, *TIP1*, and *SFG1*) mRNA levels between wild-type (PC538+pRS316) and *ste12Δ* (PC539). Normalized to *ACT1* expression, Wild type values set to 1. Cells grown in YP-Gal (2%) liquid medium for 5.5 h. Error represents standard deviation which varied < 20% across 3 trials. Asterisks, p-value < 0.01, by student's t-test compared to wild type.

**A**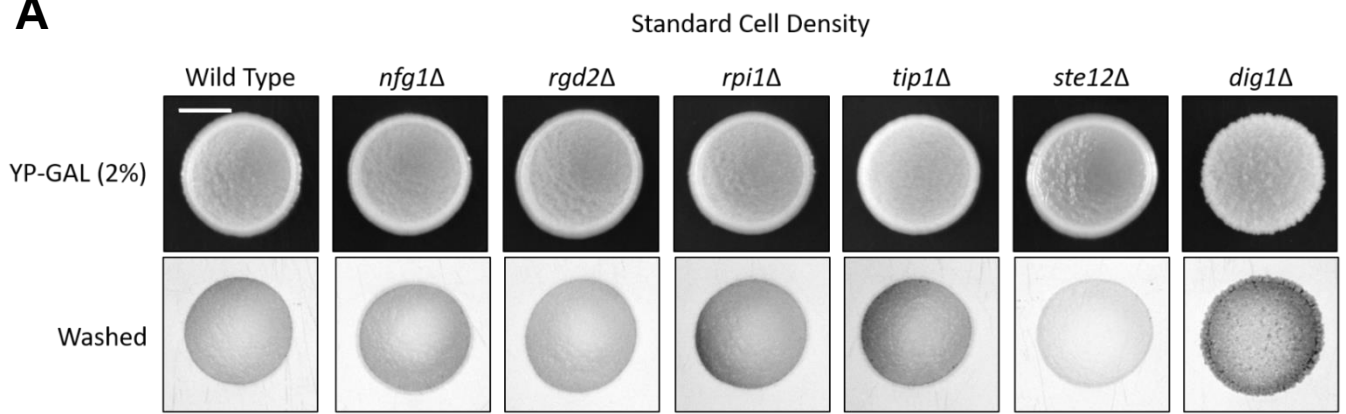**B**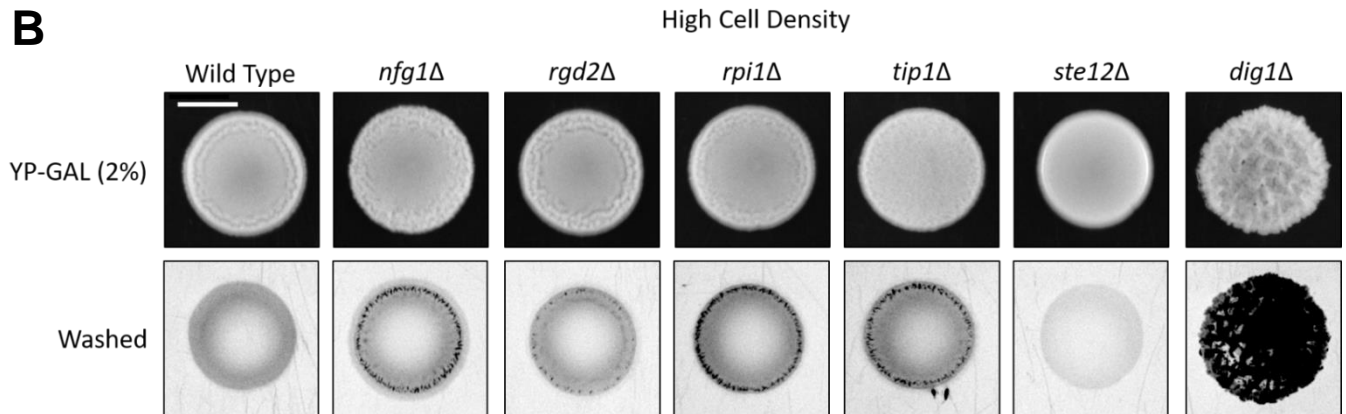

**Figure S3. Plate-washing assay of *nfg1Δ*, *rgd2Δ*, *rpi1Δ*, and *tip1Δ* with standard and high cell density on YP-Gal (2%) medium.** Plate-washing assay for wild type (PC538+pRS316) and the *nfg1Δ* (PC7147), *rgd2Δ* (PC7146), *rpi1Δ* (PC7145), *tip1Δ* (PC7277), *ste12Δ* (PC539), and *dig1Δ* (PC3039) mutants. Wild type and the *nfg1Δ* mutant data is from Fig. 2B. Top row, colonies, bottom row, inverted images of plates after wash, bar = 0.5 cm. **A)** Cells spotted, OD<sub>600</sub> = 1.5, and grown on YP-Gal (2%) medium for 3 d. **B)** Cells spotted, OD<sub>600</sub> = 11, and grown on YP-Gal (2%) medium for 2 d.

**A**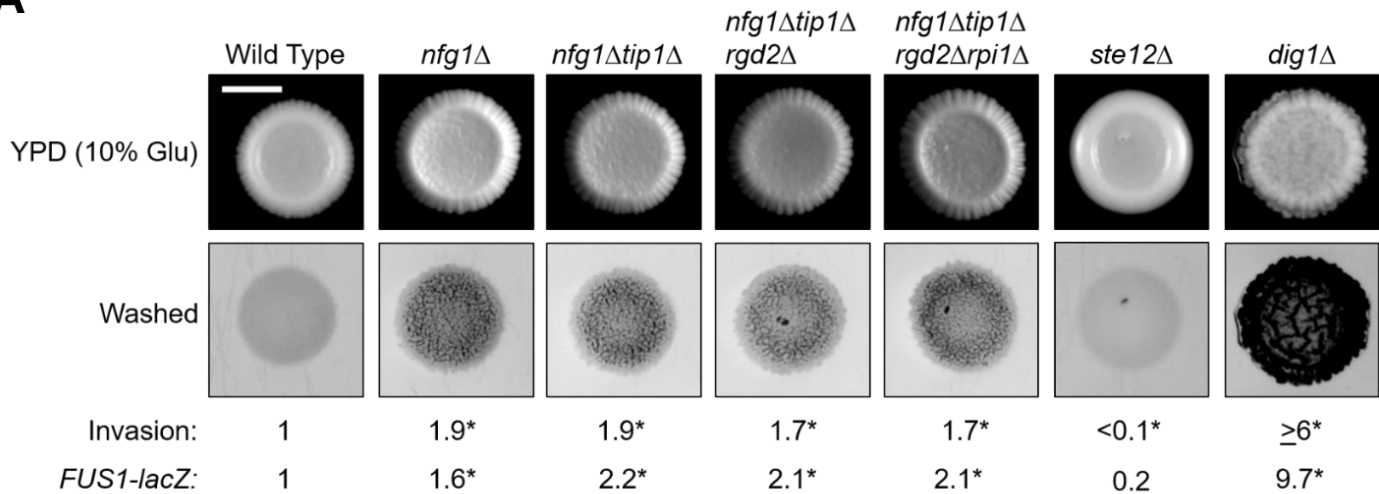**B**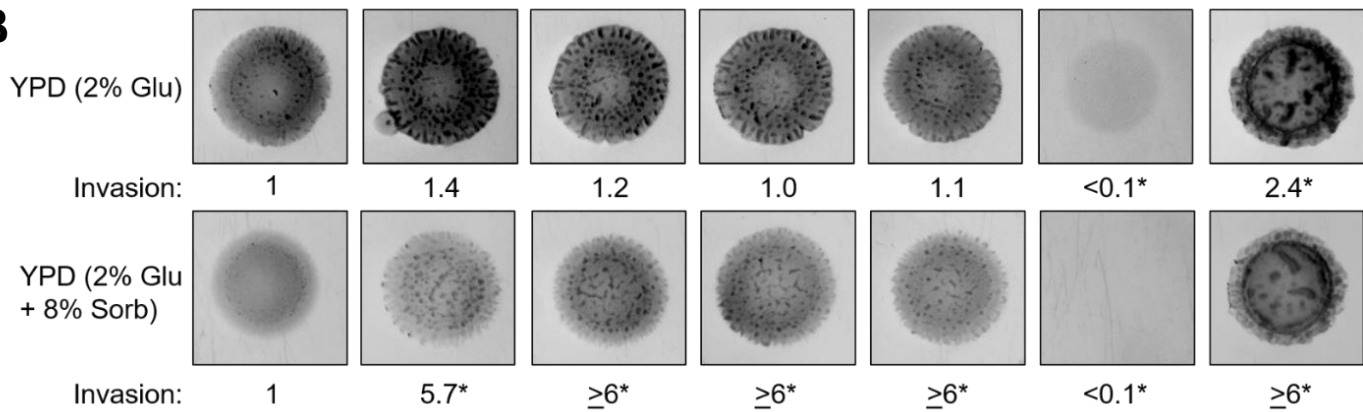

**Figure S4. Mutant combinations of negative regulators assessed by invasive growth. A)** Plate-washing assay for wild type (PC538+pRS316), and the *nfg1Δ* (PC7147), *nfg1Δtip1Δ* (PC7536), *nfg1Δtip1Δrgd2Δ* (PC7556), *nfg1Δtip1Δrgd2Δrpi1Δ* (PC7557), *ste12Δ* (PC539), and *dig1Δ* (PC3039) mutants spotted onto YPD (10% Glu) for 3 d of growth. Top row, colonies, bottom row, inverted images of plate after wash, bar = 0.5 cm. Invasion, quantification of invasive scars by ImageJ in triplicate, with wild type values set to 1. Error represents the s.e.m., which varied < 20% across trials. Asterisks, p-value ≤ 0.05, by student's t-test compared to wild type. *FUS1-lacZ*, β-Galactosidase (*lacZ*) assays. Cells grown in SD-URA for 16 h, washed, and resuspended in SD-URA for 5.5 h prior to harvesting cells by centrifugation. **B)** Plate-washing assay on YPD (2% Glu) and high osmolarity medium [YPD (2% Glu + 8% Sorb)] for 3 d. Inverted images of plates after wash for indicated strains. Colonies (not shown) were similar in size and appearance. Invasion, quantification of invasive scars by ImageJ in triplicate, with wild type values set to 1. Error represents the s.e.m., which varied < 30% across trials. Asterisks, p-value < 0.01, by student's t-test compared to wild type.

A

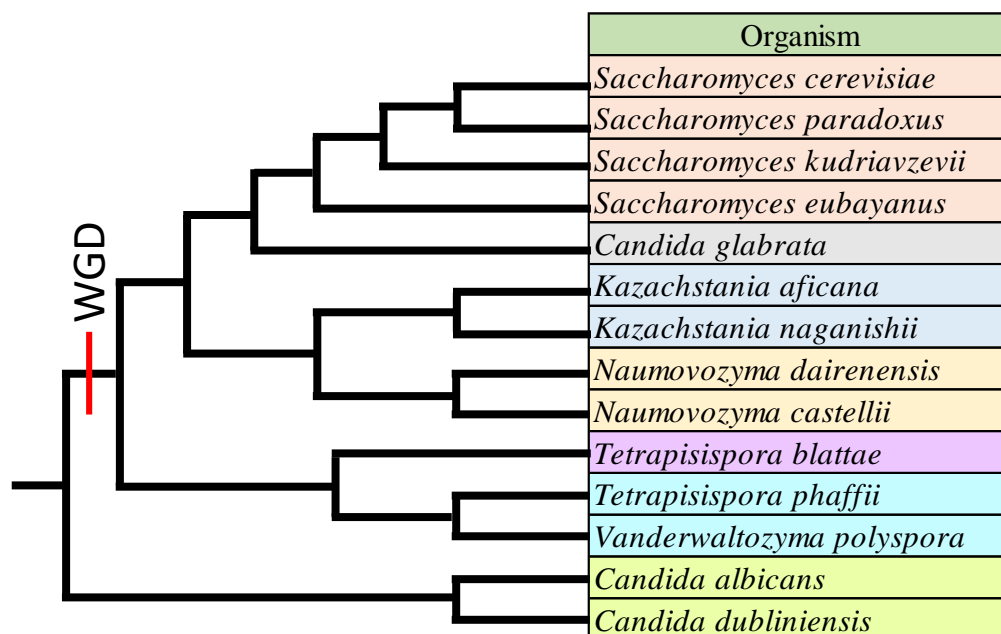

B

| Organism                          | Protein BLAST of Nfg1p |            | Protein BLAST Rgd2p |            | Protein BLAST Rplp |            | Protein BLAST Tip1p |            | Protein BLAST Sfg1p |            |
|-----------------------------------|------------------------|------------|---------------------|------------|--------------------|------------|---------------------|------------|---------------------|------------|
|                                   | Query Cover            | % Identity | Query Cover         | % Identity | Query Cover        | % Identity | Query Cover         | % Identity | Query Cover         | % Identity |
| <i>Saccharomyces cerevisiae</i>   | -                      | -          | -                   | -          | -                  | -          | -                   | -          | -                   | -          |
| <i>Saccharomyces paradoxus</i>    | 99                     | 83.85      | 99                  | 95.24      | 99                 | 75.18      | 93                  | 79.8       | 99                  | 87.85      |
| <i>Saccharomyces kudriavzevii</i> | 99                     | 67.90      | N/A                 | N/A        | 99                 | 84.73      | N/A                 | N/A        | 99                  | 83.82      |
| <i>Saccharomyces eubayanus</i>    | 99                     | 75.31      | 99                  | 90.06      | 99                 | 79.9       | 93                  | 74.75      | 99                  | 78.61      |
| <i>Candida glabrata</i>           | N/A                    | N/A        | 99                  | 55.56      | 22                 | 59.34      | 46                  | 53.54      | 33                  | 45.69      |
| <i>Kazachstania aficana</i>       | N/A                    | N/A        | 99                  | 54.17      | 76                 | 33.54      | 41                  | 45.05      | 97                  | 36.24      |
| <i>Kazachstania naganishii</i>    | N/A                    | N/A        | 99                  | 55.6       | 41                 | 42.35      | 47                  | 44         | 96                  | 33.6       |
| <i>Naumovozyma dairenensis</i>    | N/A                    | N/A        | 99                  | 56.4       | 75                 | 37.54      | 56                  | 61.48      | 99                  | 38.54      |
| <i>Naumovozyma castellii</i>      | N/A                    | N/A        | 99                  | 56.86      | 41                 | 49.41      | 46                  | 70.59      | 99                  | 40.33      |
| <i>Tetrapisispora blattae</i>     | N/A                    | N/A        | N/A                 | N/A        | 31                 | 49.62      | 52                  | 48.18      | 38                  | 42.25      |
| <i>Tetrapisispora phaffii</i>     | N/A                    | N/A        | 99                  | 55.75      | 36                 | 44.97      | 51                  | 41.07      | 40                  | 41.03      |
| <i>Vanderwaltozyma polyspora</i>  | N/A                    | N/A        | 99                  | 61.51      | N/A                | N/A        | N/A                 | N/A        | 41                  | 49.06      |
| <i>Candida albicans</i>           | N/A                    | N/A        | 99                  | 37.33      | N/A                | N/A        | N/A                 | N/A        | 45                  | 28.75      |
| <i>Candida dubliniensis</i>       | N/A                    | N/A        | 99                  | 36.78      | N/A                | N/A        | N/A                 | N/A        | N/A                 | N/A        |

**Figure S5. *NFG1* is conserved within the *Saccharomyces* clade.** **A)** Cladogram of a subgroup of yeasts (Shen et al., 2018). WGD = whole genome duplication. **B)** Comparative analysis by BLAST for indicated protein sequence. Query cover, percentage of query sequence that overlaps the reference sequence. % identity, percentage of how similar query sequence is to the reference sequence. Significance by E value, all E values were significant being  $\leq 2E-12$ , except the protein BLAST for Sfg1p in *Candida albicans* was not significant (E value = 0.67). N/A = not available.

**A**YPD (2% Glu)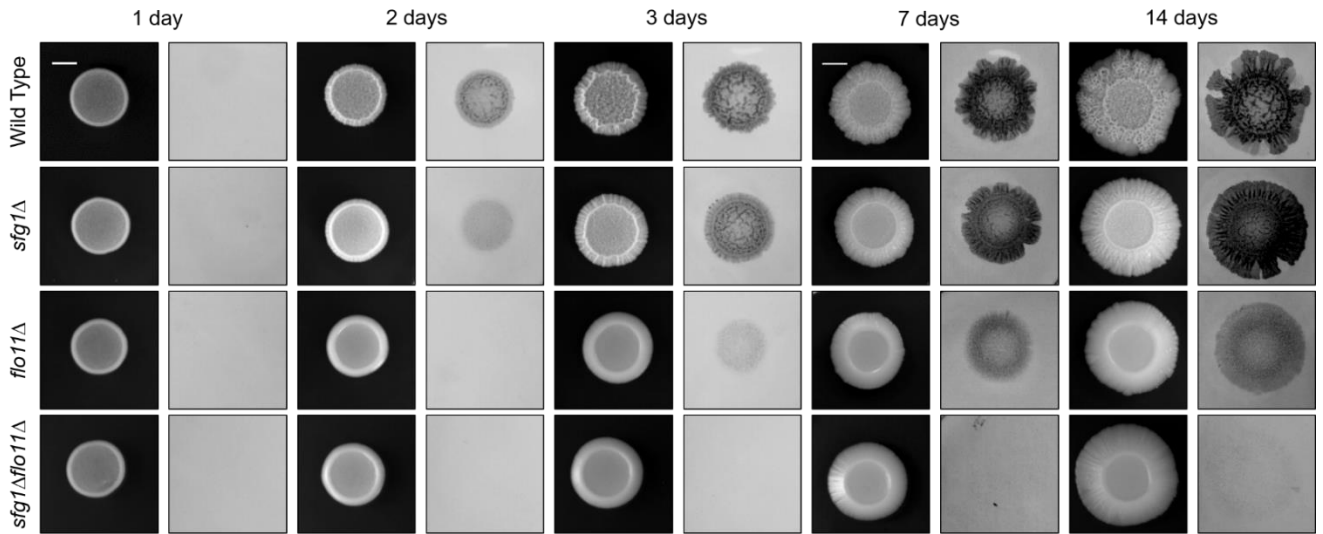**B**YP-GAL (2%)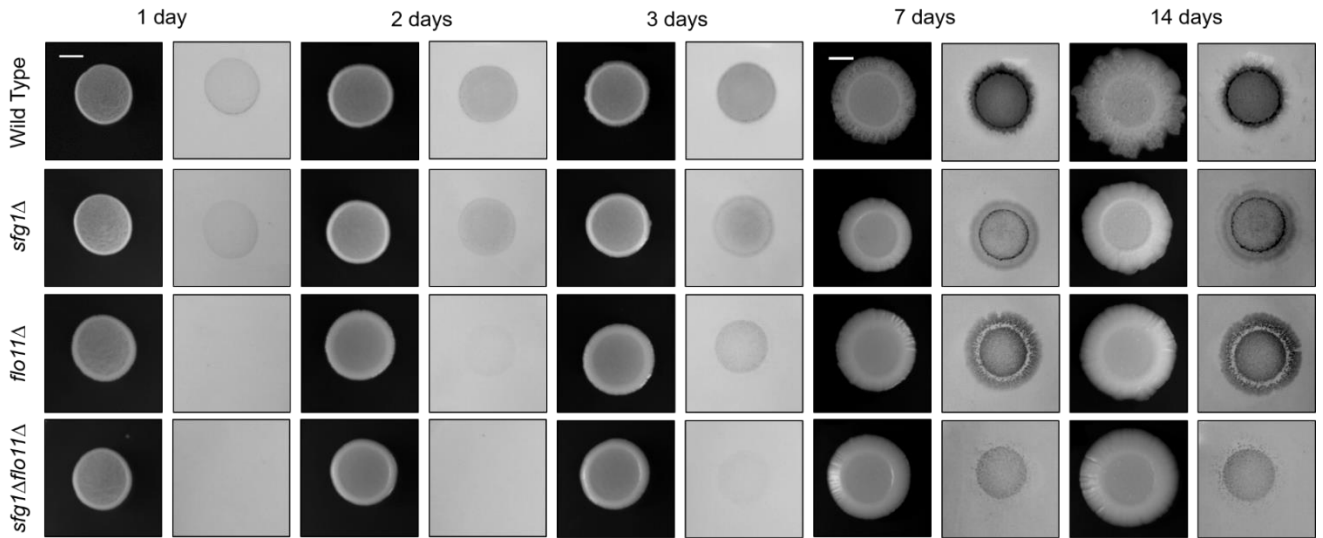

**Figure S6. Time course of plate-washing assay over 14 d.** Plate-washing assay for wild type (PC538), *sfg1Δ* (PC7144), *flo11Δ* (PC1029), and *sfg1Δflo11Δ* (PC7280) strains grown for 1 d, 2 d, 3 d, 7 d, and 14 d. 7 d data also appears in Figure 4A. Columns with black background, colonies, light background, inverted images of plates after wash, bars = 0.5 cm. **A)** Cells were spotted onto YP-Gal (2%) medium. **B)** Cells were spotted onto YPD (2% Glu) medium.

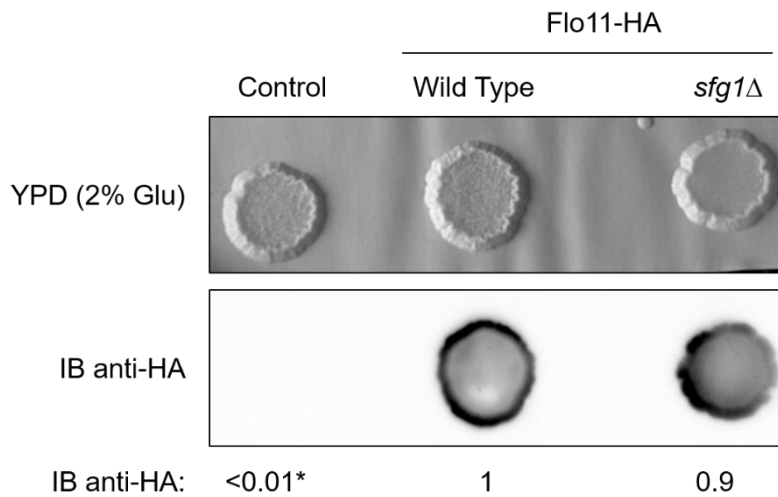

**Figure S7. Sfg1p does not regulate Flo11p shedding on YPD (2% Glu).** Colony immunoblot analysis to detect HA-tagged Flo11p with anti-HA antibodies was performed for wild type (PC538), *FLO11*-HA (PC2043), and *sfg1ΔFLO11*-HA (PC7321) strains grown on nitrocellulose membranes atop 2% glucose YPD semi-solid agar medium for 3 d. Numbers refer to the intensity of anti-HA quantified by image lab. Error is s.e.m. with < 15% variation across trials. Asterisk, p-value < 0.01, by student's t-test compared to wild type.
